# Supplementary material for: Pt/SSZ-13 as an efficient catalyst for the selective catalytic reduction of NOx with H2
Source: Royal Society of Chemistry journal article supplement (doi:10.1039/c9cy00898e), 2019-01-01
Supplement: c9cy00898e1.pdf [file c9cy00898e1.pdf]

## Supporting Information

### **Pt/SSZ-13 as an efficient catalyst for the selective catalytic reduction of NO<sub>x</sub> with H<sub>2</sub>**

Zhe Hong †<sup>a, c</sup>, Xianyong Sun †<sup>b</sup>, Zhong Wang <sup>c</sup>, Guoqing Zhao <sup>a</sup>, Xuebing Li <sup>c, \*</sup>,

Zhirong Zhu <sup>a, \*</sup>

<sup>a</sup> *School of Chemical Science and Engineering, Tongji university, Shanghai 200082, China;*

<sup>b</sup> *Jiangsu Sinocera-Tiannuo New Material Technology Co., Ltd., Zhenjiang 212000, China;*

<sup>c</sup> *Key Laboratory of Biofuels, Qingdao Institute of Bioenergy and Bioprocess Technology, Chinese*

*Academy of Sciences, Qingdao 266101, China;*

---

\*Corresponding author

E-mail address: [zhuzhirong@tongji.edu.cn](mailto:zhuzhirong@tongji.edu.cn); [lixb@qibebt.ac.cn](mailto:lixb@qibebt.ac.cn).

Table S1 Summaries of the catalytic activity over Pt catalysts in the literature for H<sub>2</sub>-SCR

| Catalysts                         | Reaction condition                                                                             | NO <sub>x</sub> conversion (%) | T <sub>max</sub> (°C) | Refs       |
|-----------------------------------|------------------------------------------------------------------------------------------------|--------------------------------|-----------------------|------------|
| Pt/SSZ-13                         | 1000ppm NO <sub>x</sub> , 5000ppm H <sub>2</sub> , 10% O <sub>2</sub> , N <sub>2</sub> balance | 81                             | 100                   | This study |
| Pt/SAPO-34                        | 1000ppm NO <sub>x</sub> , 5000ppm H <sub>2</sub> , 10% O <sub>2</sub> , N <sub>2</sub> balance | 59                             | 120                   | This study |
| Pt/ZSM-5                          | 1000ppm NO <sub>x</sub> , 5000ppm H <sub>2</sub> , 10% O <sub>2</sub> , N <sub>2</sub> balance | 70                             | 120                   | This study |
| Pt/MgO-CeO <sub>2</sub>           | 1000ppm NO <sub>x</sub> , 10000ppm H <sub>2</sub> , 5% O <sub>2</sub> , He balance             | 80                             | 150                   | [23]       |
| Pt/ZSM-35                         | 1000ppm NO <sub>x</sub> , 5000ppm H <sub>2</sub> , 6% O <sub>2</sub> , N <sub>2</sub> balance  | 80                             | 120                   | [13]       |
| Pt/TiO <sub>2</sub>               | 2500ppm NO <sub>x</sub> , 10000ppm H <sub>2</sub> , 5% O <sub>2</sub> , He balance             | 81                             | 200                   | [24]       |
| Pt-MnO <sub>x</sub>               | 500ppm NO <sub>x</sub> , 8000ppm H <sub>2</sub> , 5% O <sub>2</sub> , He balance               | 64                             | 100                   | [25]       |
| Pt/C                              | 1000ppm NO <sub>x</sub> , 5000ppm H <sub>2</sub> , 2% O <sub>2</sub> , N <sub>2</sub> balance  | 55                             | 120                   | [26]       |
| Pt/SiO <sub>2</sub>               | 500ppm NO <sub>x</sub> , 20000ppm H <sub>2</sub> , 6% O <sub>2</sub> , N <sub>2</sub> balance  | 75                             | 90                    | [27]       |
| Pt/Al <sub>2</sub> O <sub>3</sub> | 500ppm NO <sub>x</sub> , 20000ppm H <sub>2</sub> , 6% O <sub>2</sub> , N <sub>2</sub> balance  | 50                             | 140                   | [12]       |
